# Supplementary material
Source: Springer Nature journal article supplement (https://www.springermedizin.de/resource/supplementary/12890_2012_454_MOESM2_ESM.pdf/9505574)

NF- $\kappa$ B p65 DNA binding  
(Absorbance Units)

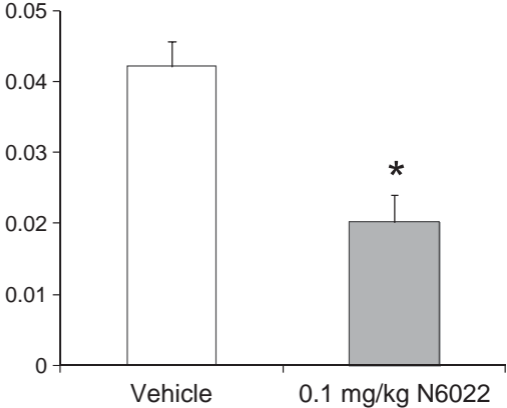

Supplement: MOESM2 [file 9505574]
